1        **Deciphering copper coordination in the animal prion protein amyloidogenic domain**

2

3            Giulia Salzano<sup>1</sup>, Martha Brennich<sup>2</sup>, Giordano Mancini<sup>3,4</sup>, Thanh Hoa Tran<sup>1</sup>, Giuseppe  
4                            Legname<sup>1,5</sup>, Paola D'Angelo<sup>6\*</sup> and Gabriele Giachin<sup>7\*</sup>

5

6        <sup>1</sup> Department of Neuroscience, Scuola Internazionale Superiore di Studi Avanzati (SISSA),  
7        Trieste, Italy

8        <sup>2</sup> European Molecular Biology Laboratory (EMBL), Grenoble Outstation, Grenoble, France

9        <sup>3</sup> Scuola Normale Superiore, Pisa, Italy

10       <sup>4</sup> Istituto Nazionale di Fisica Nucleare (INFN), Pisa, Italy

11       <sup>5</sup> ELETTRA -Sincrotrone Trieste S.C.p.A, Trieste, Italy

12       <sup>6</sup> Department of Chemistry, Sapienza University of Rome, Rome, Italy

13       <sup>7</sup> European Synchrotron Radiation Facility (ESRF), Grenoble, France

14

15       \* Correspondence should be addressed to P.D. ([p.dangelo@uniroma1.it](mailto:p.dangelo@uniroma1.it)) and G.G.  
16       ([gabriele.giachin@esrf.fr](mailto:gabriele.giachin@esrf.fr)).

17

18 **ABSTRACT**

19 Prions are pathological isoforms of the cellular prion protein (PrP<sup>C</sup>) responsible for transmissible  
20 spongiform encephalopathies (TSE). PrP<sup>C</sup> interacts with copper through unique octarepeat and  
21 non-octarepeat (non-OR) binding sites. Previous works on human PrP<sup>C</sup> suggest that copper  
22 binding to the non-OR region may have a role during prion conversion. The molecular details of  
23 copper coordination within the non-OR region are not well characterized. By means of small  
24 angle X-ray scattering (SAXS) and extended X-ray absorption fine structure (EXAFS)  
25 spectroscopy, we have investigated the Cu(II) structural effects on the protein folding and its  
26 coordination geometries when bound to the non-OR region of recombinant PrP<sup>C</sup> (recPrP) from  
27 animal species considered high or less resistant to TSE. As TSE-resistant model, we used ovine  
28 PrP<sup>C</sup> carrying the protective polymorphism at residues A136, R154 and R171 (OvPrP ARR);  
29 while as highly TSE-susceptible PrP<sup>C</sup> models we employed OvPrP with polymorphism V136,  
30 R154 and Q171 (OvPrP VRQ) and Bank vole recPrP (BvPrP). Our results reveal that Cu(II)  
31 affects the structural plasticity of the non-OR region leading to a more compacted conformation  
32 of recPrP. We also identified two Cu(II) coordinations in the non-OR region of these animal  
33 species. In *type-1* coordination present in OvPrP ARR, Cu(II) is coordinated by four residues  
34 (S95, Q98, M109 and H111). Conversely, the *type-2* coordination is present in OvPrP VRQ and  
35 BvPrP, where Cu(II) is coordinated by three residues (Q98, M109 and H111) and by one water  
36 molecule, making the non-OR region more flexible and open to the solvent. These changes in  
37 copper coordination in prion resistant and susceptible species provide new insights into the  
38 molecular mechanisms governing the resistance or susceptibility of certain species to TSE.

39

40 **Running Title:** SAXS and EXAFS on Cu(II)-prion proteins

41

42 **Keywords**

43 Prion protein, SAXS, Ensemble Optimization Method, EXAFS spectroscopy, non-OR region,  
44 copper coordination, transmissible spongiform encephalopathies.

45

## 46 INTRODUCTION

47 Prion diseases or transmissible spongiform encephalopathies (TSE) are neurodegenerative  
48 disorders affecting humans and animals. TSE are caused by the misfolding of the  $\alpha$ -helical form  
49 of the physiological cellular prion protein (PrP<sup>C</sup>) into a  $\beta$ -sheet rich isoform called prion or PrP<sup>Sc</sup>  
50 (1). TSE are rare disorders that can be sporadic, genetic or infectious. Animal TSE include  
51 scrapie in sheep and goats, chronic wasting disease (CWD) in cervids and bovine spongiform  
52 encephalopathy (BSE) in cattle (2).

53 The PrP<sup>C</sup> structure consists in a C-terminal folded domain (from residues 128 to 231, hereafter in  
54 human numbering) mainly containing  $\alpha$ -helical motifs and two short anti-parallel  $\beta$ -sheets (3).  
55 On the contrary, the N-terminal moiety (residues 23-127) is largely unstructured (4) and features  
56 an octapeptide-repeat region (OR) (residues 61-91) composed by four octapeptides, each  
57 carrying histidines able to coordinate prevalently one copper ion, Cu(II) (5). Cu(II) can also bind  
58 at two additional histidines -H96 and H111 with coordination from the imidazole rings and  
59 nearby backbone amides- located in a segment (residues 90-111) called “fifth” or non-OR copper  
60 binding site (6) (Figure 2 A). Adjacent to the non-OR region is the palindromic motif of  
61 sequence AGAAAAGA (residues 113-120) known to be able to initiate neurotoxic  $\beta$ -sheet  
62 formation (7-9). Although PrP<sup>C</sup> and PrP<sup>Sc</sup> have identical primary sequence, they have distinct  
63 physicochemical properties. PrP<sup>C</sup> exists as a detergent-soluble monomer and is readily degraded  
64 by proteinase K (PK), whereas PrP<sup>Sc</sup> forms detergent-insoluble aggregates and shows high  
65 resistance to PK digestion (10). Following treatment with PK, PrP<sup>Sc</sup> typically generates a  
66 protease-resistant core, referred to as PrP27-30, which is N-terminally truncated at around  
67 residue 78 (11) and it is sufficient to support prion replication and disease progression (12).

68 The functional implications of Cu(II)-binding to PrP<sup>C</sup> are not unequivocal. Compelling evidences  
69 propose a Cu(II)-mediated neuroprotective role for PrP<sup>C</sup> functions as modulator of synaptic  
70 plasticity and S-nitrosylation (13-14); some others point out the role of Cu(II) either as promoter  
71 or attenuator of  $\beta$ -sheet conversion and amyloid aggregation (15-18). The proximity of the non-  
72 OR region to the amyloid core suggests a possible link between Cu(II) binding and prion  
73 conversion (15, 19). We have recently reported that pathogenic PrP<sup>C</sup> genetic mutations affect  
74 Cu(II) coordination in the non-OR region and this altered coordination promotes prion  
75 conversion *in vitro* and in cellular models (20-21). The involvement of H96 and H111 in non-OR  
76 region shows that Cu(II) occupancy plays a role in determining the conformation of this section  
77 inducing novel long-range interactions between the N- and C-terminal PrP<sup>C</sup> region with possible  
78 physiological significance in prion conversion (16). Given the importance of the C-terminal

79 region for prion propagation and the controversial role of Cu(II) as attenuator or facilitator of  
80 TSE, further studies on the Cu(II)-PrP<sup>C</sup> interactions are of pivotal importance to clarify the  
81 conformational and functional consequences of Cu(II) binding to PrP<sup>C</sup>.

82 Here, we set out to investigate the Cu(II) structural effects and its coordination geometries when  
83 bound to the non-OR region of recombinant PrP<sup>C</sup> (recPrP) from animal species considered  
84 susceptible or resistant to TSE by means of small angle X-ray scattering (SAXS) and extended  
85 X-ray adsorption fine structure (EXAFS) spectroscopy. As TSE-resistant model, we used the C-  
86 terminal truncated form of ovine PrP<sup>C</sup> carrying the protective polymorphism A136, R154 and  
87 R171 (OvPrP ARR); while as highly TSE-susceptible PrP<sup>C</sup> models we employed truncated  
88 OvPrP with polymorphism V136, R154 and Q171 (OvPrP VRQ) and Bank vole recPrP (BvPrP)  
89 (22-23) (Figure 1).

90 SAXS is an established method for structural characterization of biological macromolecules in  
91 solution and it is directly applicable to the study of flexible systems such as intrinsically  
92 disordered proteins and multi-domain proteins with unstructured regions like, for instance, PrP<sup>C</sup>  
93 (24-25). Flexible particles are difficult objects to study and often little is known about their  
94 structural organization in native conditions. Consequently, standard high-resolution structural  
95 biology approaches -such as X-ray crystallography, NMR and cryo-electron microscopy- are  
96 limited in their ability to characterize disordered systems. Without the requirement for crystals  
97 and without effective size limitations, SAXS in near-native solutions is becoming more and more  
98 popular for the characterization of such systems, providing relevant information in terms of  
99 molecular shape and structural flexibility. In this study, SAXS provided new insights into the  
100 conformational aspects governing the interaction between Cu(II) and the non-OR region. The  
101 metal promotes a significant global compaction in all the different recPrP molecules. The  
102 reduction of SAXS dimensional parameters ( $R_g$  and  $D_{max}$ ) of Cu(II)-bound recPrP indicates a  
103 decrease of local flexibility in the non-OR region possibly due to transient interactions with the  
104 C-terminal region.

105 Subsequently, we used EXAFS spectroscopy as sensitive technique to study the coordination  
106 geometry of Cu(II) bound to OvPrP (ARR and VRQ) and BvPrP. X-ray absorption spectroscopy  
107 is exquisitely sensitive to the coordination geometry of an absorbing atom and therefore allows  
108 the determination of bond distances and angles of the surrounding atomic cluster to be measured  
109 with near-atomic resolution (26). We identified two Cu(II) coordination geometries, namely  
110 *type-1* and *type-2*. In *type-1*, Cu(II) is bound to the side chains of four amino acids (S95, Q98,  
111 M109 and H111); this coordination is present in OvPrP ARR and in WT HuPrP. Conversely,

112 *type-2* is present in TSE-susceptible species: bank vole, sheep with VRQ polymorphism and  
113 human with pathogenic mutations (20-21), where Cu(II) is coordinated by three amino acids  
114 (Q98, M109 and H111) and by one water molecule.

115 Our results reveal that Cu(II) affects the structural plasticity of the non-OR region leading to a  
116 more compacted conformation of recPrP. We also observe that the non-OR Cu(II) coordinations  
117 changes in the recPrP of TSE-resistant and susceptible species. These data support the hypothesis  
118 that amino acid variations observed in mammalian PrP<sup>C</sup> sequences may have structural effects on  
119 both the globular domain and the N-terminal moiety, particularly in the non-OR region with  
120 consequences on Cu(II) coordination. These changes in copper coordination in prion resistant  
121 and susceptible species have important physiological implications, providing new insights into  
122 the molecular mechanisms governing the resistance or susceptibility of certain species to TSE.

123

## 124 **MATERIALS AND METHODS**

### 125 **Plasmids construction, protein expression and purification**

126 The pET-11a plasmid (Novagen) encoding for the truncated BvPrP (residues 90-231), OvPrP  
127 VRQ (residues 94-234, carrying the TSE-susceptible polymorphism V136, R154 and Q171) and  
128 OvPrP ARR (residues 94-234, carrying the TSE-resistant polymorphism A136, R154 and R171)  
129 were purchased from Genewiz (Germany, GmbH). All the recombinant proteins were expressed,  
130 purified and *in vitro* refolded according to our previous protocols (20-21).

131

### 132 **SEC-SAXS measurements, data analysis and modelling**

133 All the experiments were performed at the ESRF BioSAXS beamline BM29, Grenoble, France  
134 (27). Given the sensitivity for batch SAXS mode for even small amounts of large soluble  
135 aggregates we used SEC-SAXS approaches to measure SAXS data only on monodisperse  
136 samples. A volume of 250  $\mu$ L of protein *per* each BvPrP sample (*apo* and copper-loaded) at 12  
137 mg/mL was loaded on a GE Superdex 75 10/300 GL column, and a volume of 50  $\mu$ L protein *per*  
138 each OvPrP ARR and OvPrP VRQ (*apo* and copper-loaded) samples at 7 mg/mL was loaded on  
139 a GE Superdex 200 5/150 GL column *via* a high performance liquid chromatography (HPLC)  
140 system (DGU-20A5R, Shimadzu, France) attached directly to the sample-inlet valve of the  
141 BM29 sample changer (28). All the *apo* samples were measured in buffer 25 mM Sodium  
142 Acetate, 250 mM NaCl, pH 5.5 at 20 °C. Cu(II) loading on recPrP samples were achieved by  
143 dialysis (Spectra/Por 3.5 kDa MWCO membrane) against buffer 25 mM Sodium Acetate, 250

144 mM NaCl, pH 5.5 containing CuSO<sub>4</sub> at 1:1 (Cu(II):recPrP) molar ratio at 4 °C for 12 hours, and  
145 then against buffer 25 mM Sodium Acetate, 250 mM NaCl, 1 μM of CuSO<sub>4</sub>, pH 5.5 to remove  
146 the excess of metal at 4 °C for 4 hours. After centrifugation (30 minutes, 16,000 g at 4 °C),  
147 Cu(II)-samples were then measured in buffer 25 mM Sodium Acetate, 250 mM NaCl, 1 μM of  
148 CuSO<sub>4</sub>, pH 5.5 at 20 °C. The columns were equilibrated with 3 column volumes to obtain a  
149 stable background signal that was confirmed before measurement. All the SAXS data were  
150 collected at a wavelength of 0.99 Å using a sample-to-detector (PILATUS 1 M, DECTRIS)  
151 distance of 2.81 m. The scattering of pure water was used to calibrate the intensity to absolute  
152 units (29). Data reduction was performed automatically using the EDNA pipeline (30). Frames in  
153 regions of stable  $R_g$  were selected and averaged using PRIMUS (31) to yield a single averaged  
154 frame corresponding to the scattering of individual SEC species. All parameters for SAXS  
155 analysis, sample details and results are described in Table S1 according to recent recommended  
156 guidelines (32). Briefly, analysis of the overall parameters was carried out by PRIMUS from  
157 ATSAS 2.8.4 package (33) and by ScÅtter 3.0 software. The pair distance distribution function,  
158  $P(r)$ , and maximum diameter of the particle ( $D_{max}$ ) were calculated in GNOM using indirect  
159 Fourier transform method (34). Protein molecular masses were estimated using both Porod  
160 volume (34) and scattering mass contrast (32) methods. For low-resolution structural models,  
161 Ensemble Optimization Method (EOM) modeling was conducted using models of the BvPrP  
162 (amino acids 170-231, PDB id 2K56) and OvPrP (amino acids 170-231, PDB id 1Y2S)  
163 previously solved by NMR (35-36), and the rest of the protein was represented as beads  
164 corresponding to individual residues (37). EOM employs a genetic algorithm to select subsets of  
165 conformations from the random pool that best fits the experimental data. The selected ensembles  
166 represent a low-resolution sample space used to generate distributions of structural parameters  
167 (37-38). An initial random pool of 10,000 models was generated in RanCh (version 2.1) (38).  
168 Final ensembles were selected from the starting pool using a genetic algorithm implemented in  
169 GAJOE (version 2.1) (38). All SAXS data were deposited into SASBDB data bank (ID:  
170 SASDEW7, SASDEX7, SASDEY7, SASDEZ7, SASDE28, SASDE38, see Table S1).

171  
172 **XAS spectra measurements and data analysis**  
173 Samples with 1:1 (Cu(II):recPrP) molar ratio were prepared in 25 mM NaOAc, pH 5.5, with a  
174 protein concentration of ~1 mM. Briefly, recPrP were first dialyzed (Spectra/Por 3.5 kDa  
175 MWCO membrane) against buffer containing 25 mM NaOAc, 1 mM of CuSO<sub>4</sub>, pH 5.5 and then

176 against the same buffer containing 1  $\mu\text{M}$  of  $\text{CuSO}_4$  to remove the excess of unbound metal.  
177 Sample monodispersity after  $\text{Cu(II)}$  loading was assessed by SEC using a GE Superdex 200  
178 Increase 10/300 GL column. X-ray absorption spectra were recorded at ESRF on BM30B FAME  
179 beamline (39). The spectra were collected at the Cu K-edge in fluorescence mode using a solid  
180 state 30-element Ge detector, with sample orientation at  $45^\circ$  to incident beam. The X-ray photon  
181 beam was vertically focused by a Ni–Pt mirror, and dynamically, sagittally focused in the  
182 horizontal size. The monochromator was equipped with a Si(111) double crystal, in which the  
183 second crystal was elastically bent to a cylindrical cross section. The energy resolution at the Cu  
184 K-edge is 0.5 eV. The spectra were calibrated by assigning the first inflection point of the Cu foil  
185 spectrum to 8981 eV. All the spectra were collected at 10 K. For  $\text{Cu(II)}$  samples, photo reduction  
186 is usually observed and thus the beam was moved to different spots of the sample at each scan.  
187 During collection, data were continuously monitored in order to insure sample homogeneity  
188 across the multiple spots collected from different sample-holder's cells. The following samples  
189 were measured:  $\text{Cu(II)-OvPrP ARR}$ ,  $\text{Cu(II)-OvPrP VRQ}$  and  $\text{Cu(II) BvPrP}$ . For each sample, 12  
190 spectra were recorded with a 7 s/point collection statistic and averaged. The collection time was  
191 25 min for each spectrum.

192 The analysis of the EXAFS data was carried out using the GNXAS code (40-41) which is based  
193 on a theoretical calculation of the X-ray absorption fine structure signal and a subsequent  
194 refinement of the structural parameters. In the GNXAS approach the interpretation of the  
195 experimental data is based on the decomposition of the EXAFS  $\chi(k)$  signal into a summation  
196 over n-body distribution functions  $\gamma^{(n)}$ , calculated by means of the multiple scattering (MS)  
197 theory. Each signal has been calculated in the muffin-tin approximation using the Hedin-  
198 Lundqvist energy dependent exchange and correlation potential model, which includes inelastic  
199 loss effects. The analysis of the EXAFS spectra was carried out starting from the coordination  
200 models reported in the literature for the WT HuPrP and HuPrP Q212P proteins (6, 20-21), and  
201 considering the amino acid sequences of the species. In particular, the analysis of the OvPrP  
202 ARR resistant specie has been carried out considering the coordination with a nitrogen atom of  
203 H111, with two oxygen atoms of S95 that chelates the  $\text{Cu(II)}$  ion forming a ring in the equatorial  
204 pane (in this case two carbon atoms of the serine give rise to a single scattering contribution at  
205 about 2.86 Å), with an oxygen atom of Q98 and a sulfur atom of M109. The EXAFS spectra of  
206 the more susceptible OvPrP VRQ and BvPrP species have been analysed using the same model  
207 as HuPrP Q212P where the  $\text{Cu(II)}$  ion is coordinated by H111, Q98, M109 and a water molecule.  
208 Based on these two models theoretical EXAFS spectra were calculated to include contributions



209 from first shell two-body signals and many body configurations. Previous investigations on  
210 model compounds have shown that a quantitative EXAFS analysis of systems containing  
211 histidine rings or having amino acid residues that are chelated to the Cu(II) ion, requires a proper  
212 treatment of MS contributions (6, 20-21, 42). In particular, the EXAFS analysis of systems  
213 containing histidine rings requires a proper treatment of MS four-body terms associated with the  
214 Cu-N-C-C(N) configurations, while coordination with S95 gives rise to three-body terms  
215 associated with the Cu-O-C configuration having a multiplicity of two. The structural parameters  
216 used in the fits are the bond distance ( $R$ ) and bond variance ( $\sigma^2_R$ ) for a two-body signal, the two  
217 shorter bond distances, the intervening angle ( $\theta$ ) and the six covariance matrix elements for a  
218 three-body signal. The four-body configurations are described by six geometrical parameters,  
219 namely, the three bond distances, two intervening angles ( $\theta$  and  $\varphi$ ), and the dihedral angle ( $\psi$ )  
220 defining the spatial orientation of the three bonds. These parameters were allowed to float within  
221 a preset range, typically  $\pm 0.05 \text{ \AA}$  and  $\pm 5^\circ$  for distances and angles respectively. During the  
222 minimization procedures, the magnitudes of the Debye–Waller terms were assumed to increase  
223 with distance, and atoms at similar distances from the copper ion were assigned the same value.  
224 In all cases two additional nonstructural parameters are minimized, namely  $E_0$  (core ionization  
225 threshold) and  $S_0^2$  (many body amplitude reduction factor). To establish error limits on the  
226 structural parameters, a number of selected parameters from the fit results are statistically  
227 analyzed using two-dimensional contour plots. This analysis examines correlations among fitting  
228 parameters and evaluates statistical errors in the determination of the copper coordination  
229 structure, as previously described (20). Briefly, parameters with highest correlation dominate in  
230 the error estimate. The quality of the fits is determined by the goodness-of-fit parameter,  $R_i$  (42),  
231 and by careful inspection of the EXAFS residuals.

232

## 233 RESULTS

### 234 Mammalian prion proteins undergo major compactness changes in presence of copper

235 The structural consequences of Cu(II) on PrP<sup>C</sup> were previously investigated by SAXS on full-  
236 length murine recPrP (MoPrP) reporting a global compaction of the protein due to inter-domain  
237 interactions upon metal binding to the eight tandem repeat region (16). Here, we investigated by  
238 SAXS the Cu(II) role on the solution structures of C-terminal truncated recPrP carrying only the  
239 non-OR region as metal binding site. Structural differences due to Cu(II) interaction with the  
240 flexible N-terminal moiety (residues 90-127) may provide new insights into the molecular  
241 determinants governing the different TSE susceptibility observed in OvPrP ARR (TSE resistant),



242 in OvPrP VRQ and BvPrP (TSE susceptible). The  $R_g$ ,  $I(0)$  and UV traces as functions of frames  
243 show that recPrP were highly pure and well separated in individual peaks (Figure S1). RecPrP  
244 samples remained monodispersed after Cu(II) loading (Figure S2). All SAXS results are exposed  
245 in Table S1. Data frames under each of the main elution peaks -for which the  $R_g$  values were the  
246 same within error and statistically indistinguishable as assessed using CorMap (43)- were  
247 selected and averaged for further analysis. Primary data analysis from scattering curves showed  
248 that both *apo* and Cu(II)-recPrP are very similar with an elongated and flexible shape (Figure 2,  
249 B-D) as previously observed for the *apo* and Cu(II)-loaded full-length MoPrP (16). Similar  
250 conclusions regarding flexibility can be drawn from Kratky plots (Figure S3). The  $R_g$  of recPrP  
251 determined by Guinier analysis showed small differences between *apo* and Cu(II)-bound  
252 proteins (Figure 2, B-D *insets*). In particular, the calculated  $R_g$  of *apo* BvPrP (2.41 nm), OvPrP  
253 ARR (2.32 nm) and OvPrP VRQ (2.31 nm) were slightly larger than the  $R_g$  of the same Cu(II)-  
254 bound recPrP (2.37 nm, 2.25 nm and 2.24 nm, respectively). For comparison, the  $R_g$  of  
255 BvPrP(119-231) and OvPrP(119-231) calculated from the solution NMR structures (35-36) were  
256 1.65 and 1.69 nm, respectively; however, these structures lack atomic coordinates for residues 90  
257 to 118. Overall, the molecular dimensions observed for the *apo* recPrP are in agreement with  
258 previous SEC-SAXS studies on MoPrP(89-230) (44). Distance distribution function,  $P(r)$   
259 analysis, revealed reduction in the  $D_{max}$  values from ~9.4 nm for *apo* recPrP to ~8.7 nm for  
260 Cu(II)-recPrP. For all the proteins, the  $R_g$  and  $I(0)$ -based mass values were in excellent  
261 agreement with the expected monomeric recPrP(90-231) molecular weight (*i.e.* ~16 kDa, see  
262 Table S1).

263 The N-terminal region (residues 90-127) of C-terminal recPrP is largely flexible in solution (4).  
264 Hence, we analyzed the data using EOM, which gives useful information such as  $R_g$  and  $D_{max}$   
265 distributions in case of proteins with flexible domains. EOM analysis of recPrP yielded good  
266 quality fits for the *apo* and Cu(II)-proteins (Figure 3 *insets* and Table S1). Size distributions ( $R_g$ )  
267 of *apo* versus Cu(II)-recPrP provided qualitative assessment on the structural effect of metal to  
268 protein compactness through direct comparison of the distributions of the selected ensembles and  
269 the pool (Figure 3, A-C). The EOM size distributions showed multimodal distributions that  
270 converge into a major population with  $R_g$  and  $D_{max}$  of ~2.2 nm and ~8.3 nm, respectively, for the  
271 *apo* proteins, and with  $R_g$  and  $D_{max}$  of ~2.0 nm and ~7.8 nm, respectively, for Cu(II)-recPrP.  
272 Interestingly, the ensemble conformers of TSE-resistant OvPrP ARR loaded with Cu(II) display  
273 major reduction of structural parameters (*i.e.*  $R_g$  1.93 nm and  $D_{max}$  6.57 nm) compared to TSE-  
274 susceptible Cu(II)-OvPrP VRQ and Cu(II)-BvPrP. The results from the EOM analysis of the size

275 distribution are in agreement with values obtained from  $P(r)$  distribution function, where a  
276 reduction of  $\sim 0.6$  nm has been observed for  $D_{max}$  of Cu(II)-protein compared with the *apo* form.  
277 Our results indicate that a significant amount of compaction of the extended conformation of *apo*  
278 recPrP occurs upon Cu(II) binding (Figure 3, D). Previous studies interpreted the reduction in the  
279  $R_g$  and  $D_{max}$ , leading to the global compactness of full-length Cu(II)-MoPrP, as result of a  
280 decrease in the flexibility of the N-terminal region, which exhibits interaction with the C-  
281 terminal globular domain upon metal binding (16). Here, we quantitatively measured the protein  
282 flexibility using two metrics,  $R_{flex}$  and  $R_\sigma$ , available in the EOM analysis, thus complementing the  
283 low-resolution structural descriptors (38). Using  $R_{flex}$  metric, the selected ensemble distributions  
284 can be numerically compared to that of the pool, the latter representing a reference for flexibility.  
285 For instance, the quantification of the flexibility of *apo* OvPrP ARR (ensemble  $R_{flex} = 82.62\%$   
286 versus pool  $R_{flex} = 84.37\%$ ) and Cu(II)-OvPrP ARR (ensemble  $R_{flex} = 80.73\%$  versus pool  $R_{flex} =$   
287  $86.42\%$ ) confirm numerically the effect of copper on the flexibility of the protein. Both *apo* and  
288 Cu(II)-recPrP are flexible systems, with  $R_{flex}$  values of  $\sim 80\%$ , but show less flexibility in the  
289 presence of copper as compared to the threshold of flexibility computed from the Cu(II)-recPrP  
290 pools, *i.e.*  $\sim 88\%$  (Table S1 panel e).

291  
292 **Copper coordination in the non-OR region of prion resistant species**  
293 The Cu(II) coordination structure in the non-OR binding site of HuPrP WT was unambiguously  
294 assessed by EXAFS in previous investigations (6, 20). The Cu(II) was found to be coordinated  
295 by two histidines (H96 and H111) and by Q98 and M109. It was proposed that the non-OR  
296 region is stabilized when the Cu(II) ion is coordinated by H96 and H111, and this coordination  
297 prevents prion conversion (21). The EXAFS experimental spectrum of HuPrP WT extracted with  
298 a three-segmented cubic spline shows a typical feature around  $k = 5 \text{ \AA}^{-1}$  (Figure 4 A) while the  
299 Fourier Transform (FT) spectrum is characterized by a first-shell peak centered at  $1.5 \text{ \AA}$  and  
300 additional high intensity outer shell peaks in the distance range between  $2$  and  $4 \text{ \AA}$  (Figure 4 C)  
301 that are indicative of two histidines coordinated to the metal ion (6, 20-21). The H96 residue is  
302 present in the OvPrP ARR amino acid sequence but the EXAFS spectrum of this species is  
303 different from that of HuPrP WT showing markedly different features in the  $k$  range around  $5 \text{ \AA}^{-1}$   
304  $^1$ , that is sensitive to the His ligands (Figure 4 A, B). Additionally, the intensity of the second  
305 peak of the FT at  $2.2 \text{ \AA}$  of OvPrP ARR is lower as compared to HuPrP WT (Figure 4 C, D) as  
306 only one histidine ligand coordinates the copper center, but the overall shape and intensity of the  
307 FT higher distances peaks indicate that an additional amino acid is chelated to Cu(II) ion (42).

308 By comparison of the amino acid sequences of HuPrP and OvPrP ARR (Figure 1) in the region  
309 between residues 92 and 96, two serine (S95 and S97) are present in these recPrP and both can  
310 chelate Cu(II) (42). Here, we assigned S95 as the ligand of Cu(II) ion. Starting from these  
311 observations a quantitative analysis of the EXAFS data of OvPrP ARR has been carried out  
312 using a coordination model around the Cu(II) ion comprising S95, H111 and Q98 in the  
313 equatorial plane. In particular, S95 is chelated to Cu(II) ion through two oxygen atoms forming a  
314 6-fold ring (42) and this gives rise to two Cu-O-C three-body configurations that have to be  
315 accounted for in the analysis of the EXAFS spectra. Moreover, two second shell Cu-C  
316 contributions are present at a distance of about 2.86 Å. Additional MS contributions are  
317 associated with the H111 ring and two Cu-N-C-C(N) four-body contributions have been  
318 considered. A theoretical  $\chi(k)$  signal has been calculated including all the relevant two-body and  
319 MS contributions and a fitting procedure has been carried out in the  $k$  range between 2.4 and  
320  $12.5 \text{ \AA}^{-1}$  in order to find the set of structural parameters that provides the best agreement with the  
321 experimental data. In the analysis the C-N and C-O of the amino acid residues are kept fixed to  
322 1.36 and 1.34 Å, respectively. The results of the minimization procedures are shown in Figure 6  
323 A for OvPrP ARR. From the top of Figure 6 A the following theoretical signals are shown: the  
324 two-body contribution associated with the two S95 and one Q98 Cu-O first shell distances, the  
325 two-body contribution associated with the H111 Cu-N first shell distance, the two-body  
326 contribution associated with the M109 Cu-S first shell distance, the two-body contribution  
327 associated with the two second shell Cu-C distances of S95 residue, the two-body contribution  
328 associated with the Cu-O water distance, the MS contributions associated with two Cu-O-C  
329 three-body configurations of the S95 residue, the MS contribution associated with two Cu-N-C-  
330 C(N) four-body configurations of the H111 residue, and the total  $\chi(k)$  signal compared with the  
331 experimental spectrum. The EXAFS theoretical signals match the experimental data quite well,  
332 thus confirming the validity of the Cu(II) coordination model proposed on the basis of the  
333 EXAFS, FT characteristic fingerprints as well as on the amino acid sequences. The structural  
334 parameters obtained from the EXAFS analysis are listed in Table 1. In OvPrP ARR  $S_0^2$  was  
335 found equal to 0.9, while  $E_0$  was found 3 eV above the first inflection point of the spectra. The  
336 results of the fitting procedure confirm that copper is coordinated with H111 (Cu-N distance is  
337 1.98(2) Å), with S95 through two oxygen atoms (Cu-O distance 2.00(2) Å, with an additional  
338 O/N atom at 2.00(2) Å that may belong to Q98, and one sulfur scatterer at longer distance  
339 (3.23(4)/3.27(4) Å). In the final fit one oxygen atom of the solvent at 2.28(5)/2.32(5) Å was  
340 included as suggested in previous investigations (6, 20, 45). The additional oxygen improves the

341 quality of the fit ( $R_i$  improved by 20%). Note that the inclusion of the MS signal associated with  
342 S95 is essential to reproduce the experimental spectrum ( $R_i$  improved by 30%) and this strongly  
343 supports the validity of the proposed coordination model.

344 In conclusion for OvPrP ARR the EXAFS analysis reveals the existence of a distorted octahedral  
345 geometry of the copper center and we denoted this Cu(II) coordination geometry as *type-1*.

346

### 347 **Copper coordination in the non-OR region of prion susceptible species**

348 In previous works we highlighted that HuPrP point mutations associated with genetic forms of  
349 prion diseases induce a dramatic modification of the non-OR binding site (20-21). In HuPrP  
350 Q212P, the non-OR binding site becomes less structured because H111, Q98, M109 and a water  
351 molecule bind to the metal. Both EXAFS and FT spectra of HuPrP Q212P are different from  
352 those of OvPrP ARR here analyzed (Figure 5 A, D). In particular, the HuPrP Q212P FT is  
353 characterized by outer shell peaks in the range between 2 and 4 Å with lower amplitude and this  
354 shows that only one histidine coordinates the Cu(II) ion. In the present work the copper  
355 coordination of two susceptible mammalian species, namely OvPrP VRQ and BvPrP, has been  
356 investigated by means of XAS. The EXAFS and FT experimental spectra of these systems are  
357 similar to those of HuPrP Q212P (Figure 5) and the low intensity of the second peak of the FT  
358 suggests that only one histidine coordinates the Cu(II) ion. Notably, in the case of TSE-  
359 susceptible mammalian species here investigated the intensity of the FT peak at 2.2 Å is lower  
360 than that of the TSE-resistant species, thus indicating that no other amino acid residues are  
361 chelated to the Cu(II) ion and the only MS contributions are those associated with H111 as in the  
362 case of HuPrP Q212P. The EXAFS data analyses of OvPrP VRQ and BvPrP have been carried  
363 out using the coordination geometry previously determined for HuPrP Q212P (20). In particular,  
364 the EXAFS data have been analyzed considering a fourfold coordination around the Cu(II) ion  
365 with His111 and three O/N scatterers in the equatorial plane. Also in this case the copper center  
366 interacts with the sulfur atom of M109 at longer distance. Starting from this model a theoretical  
367  $\chi(k)$  signal has been calculated and a fitting procedure has been carried out in the  $k$  range  
368 between 2.4 and 12.5 Å<sup>-1</sup>. The results of the fitting procedures are shown in Figure 6 B-C: from  
369 the top, the following theoretical signals are shown: the two-body contribution associated with  
370 three O/N atoms, the two-body contribution associated with the H111 Cu-N first shell distance,  
371 the two-body contribution associated with the M109 Cu-S first shell distance, the two-body  
372 contribution associated with the water Cu-O distance, the MS contribution associated with two  
373 Cu-N-C-C(N) four-body configurations of the H111 residue, and the total  $\chi(k)$  signal compared

374 with the experimental spectrum. The EXAFS theoretical and experimental curve show a very  
375 good agreement both for OvPrP VRQ and BvPrP, thus confirming the close similarity of the  
376 Cu(II) geometry between the susceptible mammalian species and HuPrP Q212P. The structural  
377 parameters obtained from the EXAFS analysis are listed in Table 1 and they are almost identical  
378 for OvPrP VRQ and BvPrP, and also in this case  $S_0^2$  was found equal to 0.9, while  $E_0$  was found  
379 3 eV above the first inflection point of the spectra. The results of the fitting procedure show that  
380 copper is coordinated with H111 (Cu-N distance is 2.00(2) Å), with three O/N atoms at 1.99(3)  
381 Å, and one sulfur scatterer at longer distance (3.26(4)/3.23(4) Å). In the final fit one oxygen  
382 atom of the solvent at 2.41(3)/2.43(3) Å was included as suggested in previous investigations  
383 (20-21), and its inclusion improves  $R_i$  by 20%. This coordination geometry is denoted as *type-2*.

384

## 385 DISCUSSION

386 PrP<sup>C</sup> interacts with copper through the OR and non-OR binding sites. Different findings suggest  
387 a protective role for copper when bound to the OR region since the metal inhibits the *in vitro*  
388 amplification of PrP<sup>Sc</sup>-induced recPrP aggregation and fibrillization (46-47). The OR region  
389 exhibits high reduction potential for the Cu(II)/Cu(I) couple and can initiate reactive oxygen  
390 species-mediated  $\beta$ -cleavage of PrP<sup>C</sup> at residue G90 (48-49). This may generate the N-terminally  
391 truncated form of PrP<sup>C</sup> that takes part in the amyloid core during prion conversion (50). Given  
392 the known importance of the region from residues 90 to 231 for prion formation and the  
393 proximity of the non-OR region to the palindromic amyloidogenic motif, different studies have  
394 addressed the question whether Cu(II)-bound non-OR region has a role in prion generation and  
395 disease onset. A recent report showed that transgenic mice, TgPrP(H95G), with an amino acid  
396 replacement at residue H96 had shorter disease progression than WT control mice and classical  
397 clinical signs of TSE (51). We observed that alteration of Cu(II) coordination due to H96Y  
398 mutation causes spontaneous PrP<sup>Sc</sup>-like formation in neuronal cultured cells and accumulation in  
399 the acid compartments (21). At that time, we proposed a model whereby HuPrP coordinating  
400 copper with two histidines (H96 and H111) in the non-OR region is more resistant to prion  
401 conversion compared to the protein coordinating Cu(II) with one histidine. However, little in the  
402 way of structural information exists regarding the Cu(II)-mediated non-OR stabilization and  
403 inter-domain contacts due to the intrinsic flexible nature of the non-OR segment. Here, we  
404 provide new insights into the Cu(II) structural consequences when the metal is bound to the non-  
405 OR region, particularly with regard to recPrP from well-known animal species considered to be  
406 highly TSE-resistant (sheep expressing PrP<sup>C</sup> with ARR polymorphism) or TSE-susceptible



407 (sheep with *Prnp* gene carrying the VRQ polymorphism and the bank vole animal model) (22-  
408 23).

409 Using combined SAXS and EXFAS approaches we found that Cu(II) promotes significant  
410 structural compactness of recPrP upon metal binding and displays different coordination  
411 geometries when bound to TSE-resistant or TSE-susceptible recPrP. All SAXS and EXAFS  
412 measurements were carried out at pH 5.5 where the non-OR region can still coordinate one  
413 Cu(II) ion (17, 20). The capability for Cu(II) binding at acidic pH indicates that the metal could  
414 be maintained during the cycling of the protein in the acidic endosomal compartments, where  
415 PrP<sup>C</sup> accumulations and prion conversion mainly occur (21, 52). Additionally, our previous  
416 experience with EXAFS spectroscopy leads us to the conclusion that remarkable differences in  
417 the Cu(II) coordination geometries are present only at acidic conditions and not at physiological  
418 pH (20-21). These data have been compared with previous measurements on Cu(II)  
419 coordinations in the non-OR region of HuPrP WT and of HuPrP mutants (Q212P and P102L)  
420 (21).

421 We applied the SEC-SAXS method that allowed us to collect and interpret SAXS data on  
422 experimentally difficult aggregation-prone protein system, such as truncated recPrP, and to  
423 minimize radiation damage thanks to the continuous flow (28). To dissect the different  
424 conformational recPrP states we used EOM approaches (37-38) that provided a semi-quantitative  
425 assessment on the structural effect of Cu(II) to protein compactness through direct comparison of  
426 the size distributions of the *apo versus* Cu(II)-conformers. To the best of our knowledge, this is  
427 the first SEC-SAXS investigation on recPrP with Cu(II) bound only to the non-OR region  
428 showing novel conformational aspects of Cu(II)-recPrP, such as the decrease in dimensional  
429 parameters ( $R_g$  and  $D_{max}$ ) indicative of protein compaction. Then, we expanded our  
430 understanding on Cu(II) coordination in the non-OR region of different mammalian recPrP. The  
431 EXAFS results showed that in Cu(II)-OvPrP ARR the non-OR region is structured with the  
432 metal interacting with four amino acid residues (S95, Q98, M109 and H111). Conversely,  
433 Cu(II)-OvPrP VRQ and Cu(II)-BvPrP are characterized by a more flexible non-OR binding site  
434 where solvent molecules can enter and the metal has interactions with Q98, M109 and H111.  
435 The same Cu(II) coordination was previously found in HuPrP Q212P and HuPrP P102L  
436 pathological mutants (21).

437 Based on our results and considering the amino acid sequences of the non-OR region we  
438 proposed two models of Cu(II) coordinations (Figure 7). The *type-1* coordination displays a  
439 closed non-OR region conformation, which can be associated with TSE-resistant species likely



440 because of higher stability of the non-OR region. In support, our EOM results on Cu(II)-OvPrP  
441 ARR indicate that this recPrP has a tendency to adopt a more compact folding than the TSE-  
442 susceptible VRQ variant and BvPrP. Instead, in *type-2* coordination a water molecule enters the  
443 coordination shell, thus leading to a less structured and solvent exposed non-OR region. We  
444 believe that this more opened conformation of the non-OR region in the *type-2* renders the  
445 overall PrP<sup>C</sup> structure more flexible and prone to structural rearrangements leading to prion  
446 conversion.

447 Several amino acid substitutions are present in the mammalian PrP<sup>C</sup> here investigated (Figure 1).  
448 They typically affect the rigidity of some loops, through stabilizing H-bonds, and the  
449 electrostatic surface potential without affecting global folding of the structured domain. In  
450 BvPrP, the presence of N170 determines the rigidity of the  $\beta_2$ - $\alpha_2$  loop (53), which is correlated  
451 with a higher susceptibility to horizontal TSE transmission and lower prion transmission barrier  
452 to interspecies transmission (54-56). In sheep, the different prion susceptibility is dictated by  
453 amino acid variations in the C-terminal globular domain. The X-ray crystal and NMR structures  
454 of the OvPrP ARR and VRQ variants reveal minor differences in the short-range H-bonding but  
455 major changes in the surface charge distribution, with ARR variant displaying surface charge  
456 variations in the  $\alpha_1$ - $\beta_2$ - $\alpha_2$  region (residues 154-171) (57-58).

457 Despite numerous endeavors in the prion field, the molecular mechanisms of the conversion  
458 remain still elusive. Structural studies on pathological point mutations have provided new clues  
459 on the early structural rearrangements occurring in some epitopes in the structured domain (45),  
460 but also revealed that amino acid variations have structural effects on the N-terminal part,  
461 affecting both Cu(II) coordination in the non-OR region (20) and long-range interactions  
462 between the Cu(II)-OR segment and the structured domain (59). Tertiary interactions between  
463 this flexible segment and the globular C-terminal domain occur when PrP<sup>C</sup> binds to Cu(II), or  
464 Zn(II), through the OR region (16, 59). A recent study identified by both NMR and double  
465 electron-electron resonance EPR approaches an interacting surface made by the Cu(II)-  
466 octarepeats and a negatively charged pocket in the C-terminal domain. The Cu(II)-binding only  
467 to the OR region (authors used a full-length MoPrP H95Y/H110Y construct) perturbs globular  
468 domain residues located nearby the  $\beta_1$ - $\alpha_1$  loop and the  $\alpha_2$ - $\alpha_3$  loop region (60). Similarly, the  
469 addition of Cu(II) to truncated MoPrP, carrying only the non-OR region, caused significant  
470 broadening of peaks corresponding in the <sup>15</sup>N-HSQC NMR spectrum to residues close to the  $\beta_1$ -  
471  $\alpha_1$  loop and helix  $\alpha_1$  regions (16). These observations suggest that both the Cu(II)-loaded OR and  
472 Cu(II)-non-OR regions likely bind to the same non-contiguous epitope.

473 Our SAXS and EXAFS observation led to the conclusion that Cu(II) in *type-1* coordination  
474 stabilizes the non-OR region and increases the protein compactness; this may favor more stable  
475 long-range interaction contacts between the 90–127 segment and the C-terminal aforementioned  
476 negatively charged pocket. Conversely, Cu(II) in *type-2* coordination renders the non-OR region  
477 more flexible and the N-terminal moiety more extended possibly due to less frequent inter-  
478 domain contacts. In the *apo* form, the N-terminal moiety adopts a largely disordered  
479 conformation without stabilizing interactions with the C-terminal domain. Alterations of this  
480 inter-domain contacts may have relevant physiological implications for TSE progression since  
481 this Cu(II)-promoted non-OR *cis* interaction renders PrP<sup>C</sup> more stable to PrP<sup>Sc</sup> conversion. This  
482 is consistent with observations showing that an antibody, POM1, able to abolish the N- to C-  
483 terminus interaction upon binding to the negatively charged pocket causes acute neurotoxicity in  
484 mice and cultured cerebellar brain slices (61).

485

## 486 CONCLUSIONS

487 In this work we showed that Cu(II) bound to the non-OR mediates physiologically relevant  
488 structural changes in the N-terminal moiety possibly with stabilizing interactions with the  
489 globular domain. We described two novel Cu(II) coordination geometries in the non-OR binding  
490 site of animal species considered resistant or susceptible to TSE. Changes in the non-OR  
491 conformation may dictate the lower or higher susceptibility to TSE observed in different animals.  
492 Considering the role of the non-OR and palindromic regions in supporting prion generation and  
493 propagation, this study proposes a novel structural mechanism responsible for prion  
494 susceptibility in different mammalian species.

495

496 **Author contributions**

497 G.G., P.D. and G.L. conceived the project and jointly supervised this work. G.S., G.G., P.D. and  
498 G.L. wrote the manuscript. G.S., G.G., T.H.T., G.M. and P.D. carried out EXAFS data collection  
499 at ESRF. G.S., G.G. and P.D. analyzed EXAFS data. M.B. and G.G. carried out and analyzed  
500 SAXS data. G.S. and T.H.T. provided the recombinant protein samples. All authors read and  
501 approved the final manuscript.

502

503 **Acknowledgments**

504 We thank Andrea Raspadori and Paola Zago for their contributions to recombinant proteins  
505 production. We are thankful to ESRF for the beamtimes at BM29 and at BM30B beamlines and  
506 to Isabelle Kieffer (BM30B FAME) for assistance with the measurements.

507

508 **Funding sources**

509 This work was supported by the University of Rome “La Sapienza” (Progetto ateneo 2015, n.  
510 C26H159F5, to PD).

511

512 **Conflict of interest**

513 The authors declare that they have no conflicts of interest with contests of this article.

514

515 **TABLE AND FIGURE LEGENDS**

516

517 **Table 1. Structural parameters derived from the EXAFS analysis.** Structural parameters  
518 determined from the fit of the EXAFS data at the Cu K-edge of Cu(II)-OvPrP ARR, Cu(II)-  
519 OvPrP VRQ, and Cu(II)-BvPrP.  $N$  is the coordination number,  $R$  is the distance between the  
520 copper ion and the ligand,  $\sigma^2$  is the Debye-Waller factor. Statistical errors are reported in  
521 parentheses.

522

523 **Figure 1. Amino acid sequences and secondary prion protein structure of HuPrP WT,**  
524 **OvPrP ARR, OvPrP VRQ, HuPrP Q212P and BvPrP.** Comparison of amino acid sequences  
525 and secondary prion protein structure of human (HuPrP; *Homo sapiens sapiens*, GenBank  
526 accession number AAH22532), ovine with the polymorphic residue position (Q/R) (OvPrP; *Ovis*  
527 *aries*, AFM91142) and bank vole (BvPrP; *Myodes glareolus*, AAL57231). On the top, the  
528 secondary structure elements are shown. The yellow box highlights the non-OR copper binding  
529 site (residues 90-111) and the green box the  $\beta_2$ - $\alpha_2$  loop (residues 163-172).

530

531 **Figure 2. SAXS measurements on apo and Cu(II)-recPrP. (A)** Cartoon representation of the  
532 C-terminal HuPrP with the non-OR copper binding site. The structure of the non-OR copper  
533 binding site from residue 90 to 126 is shown in blue; in ball and stick the residues coordinating a  
534 copper ion (S95, H96, Q98, H111, M109, in human numbering), the copper ion is shown as a  
535 dark green sphere. The palindromic region is shown with an enlarged ribbon. **(B-D)** SAXS  
536 curves of BvPrP, OvPrP ARR and OvPrP VRQ, respectively. Black and light blue dots represent  
537 the apo and Cu(II)-recPrP SAXS curves, respectively, with in red the GNOM fitting. Insets show  
538 the Guinier fits (yellow dots).

539

540 **Figure 3. Characterization of the flexibility of apo and Cu(II)-bound recPrP using EOM.**  
541 **(A-C)** Size distributions ( $R_g$ ) of BvPrP, OvPrP ARR and OvPrP VRQ, respectively, providing  
542 qualitative assessment through direct comparison of the distributions of the selected ensembles  
543 (black and light blue lines for apo and Cu(II)-recPrP) and the pool (dotted black and light blue  
544 lines for apo and Cu(II)-recPrP). In the insets,  $I(q)$  versus  $q$  experimental SAXS profiles (black  
545 dots for apo proteins and light-blue dots for copper-loaded proteins) with the EOM fit models  
546 (continuum red lines for apo proteins and dotted lines for copper-loaded proteins with the  
547 corresponding  $\chi^2$  values) of the recPrP. The curves are shifted by an arbitrary offset for better

548 comparison. **(D)** Representation of models of *apo* and Cu(II)-BvPrP obtained with EOM with the  
549 most representative structural parameters ( $R_g$  and  $D_{max}$ ) from the ensembles.

550  
551 **Figure 4.** Cu K-edge EXAFS experimental spectra extracted with a three-segmented cubic spline  
552 of **(A)** Cu(II)-HuPrP WT [data from reference (20)], **(B)** Cu(II)-OvPrP ARR. Non phase shift-  
553 corrected Fourier transforms of the EXAFS experimental spectrum calculated in the interval  $k =$   
554  $2.1-10.0 \text{ \AA}^{-1}$  of **(C)** Cu(II)-HuPrP WT, and **(D)** Cu(II)-OvPrP ARR.

555  
556 **Figure 5.** Cu K-edge EXAFS experimental spectra extracted with a three-segmented cubic spline  
557 of **(A)** Cu(II)-HuPrP Q212P [data from reference (20)], **(B)** Cu(II)-OvPrP VRQ and **(C)** Cu(II)-  
558 BvPrP. Non phase shift-corrected Fourier transforms of the EXAFS experimental spectrum  
559 calculated in the interval  $k = 2.1-10.0 \text{ \AA}^{-1}$  of **(D)** Cu(II)-HuPrP Q212P, **(E)** Cu(II)-OvPrP VRQ  
560 and **(F)** Cu(II)-BvPrP.

561  
562 **Figure 6.** Fit of the Cu K-edge EXAFS spectrum of Cu(II)-OvPrP ARR **(A)** carried out in the  
563 interval  $k = 2.4-12.5 \text{ \AA}^{-1}$ . From the top to the bottom the following curves are reported: the Cu-O  
564 two-body theoretical signal associated with the two S95 and one Q98 oxygen atoms, the Cu-N  
565 two-body theoretical signal associated with the H111 nitrogen atom, the Cu-S two-body  
566 theoretical signal associated with the M109 sulfur atom, the Cu-C two-body theoretical signal  
567 associated with the S95 second shell carbon atoms, the Cu-O two-body theoretical signal  
568 associated with the water molecule, the Cu-O-C three-body theoretical signal associated with the  
569 S95 residue, the Cu-N-C-C(N) four-body theoretical signal associated with the H111 residue,  
570 and the total theoretical  $\chi(k)$  signal (red dotted line) compared with the experimental spectrum  
571 (blue line). In panels **B** and **C** the fitting of the Cu K-edge EXAFS spectrum of Cu(II)-OvPrP  
572 VRQ and Cu(II)-BvPrP, respectively.

573  
574 **Figure 7.** *Type-1* and *type-2* coordination models of Cu(II) in the non-OR region of TSE-  
575 resistant and TSE-susceptible species. Blue spheres identify nitrogen atoms, red spheres are  
576 oxygen atoms and yellow spheres encode for sulfur atoms. Gray and white spheres represent  
577 carbon and hydrogen atoms, respectively.

578

579 **Table 1**

| <b>OvPrP ARR</b>   |              |                              | <b>OvPrP VRQ</b>   |              |                              | <b>BvPrP</b>       |              |                              |
|--------------------|--------------|------------------------------|--------------------|--------------|------------------------------|--------------------|--------------|------------------------------|
| <i>N</i>           | <i>R</i> (Å) | $\sigma^2$ (Å <sup>2</sup> ) | <i>N</i>           | <i>R</i> (Å) | $\sigma^2$ (Å <sup>2</sup> ) | <i>N</i>           | <i>R</i> (Å) | $\sigma^2$ (Å <sup>2</sup> ) |
| 1 N <sub>His</sub> | 1.98(2)      | 0.008(3)                     | 1 N <sub>His</sub> | 2.00(2)      | 0.008(3)                     | 1 N <sub>His</sub> | 2.00(2)      | 0.008(3)                     |
| 3 O/N              | 2.00(2)      | 0.006(3)                     | 3 O/N              | 1.99(3)      | 0.009(3)                     | 3 O/N              | 1.99(3)      | 0.009(3)                     |
| 1 O                | 2.32(5)      | 0.014(4)                     | 1 O                | 2.41(3)      | 0.010(4)                     | 1 O                | 2.43(3)      | 0.009(4)                     |
| 1 S                | 3.27(4)      | 0.009(4)                     | 1 S                | 3.26(4)      | 0.015(4)                     | 1 S                | 3.23(4)      | 0.013(4)                     |
| 2 C                | 2.87(4)      | 0.006(4)                     |                    |              |                              |                    |              |                              |

580



## 581 **References**

- 582 1. Colby DW, Prusiner SB. Prions. *Cold Spring Harb Perspect Biol.* 2011 Jan;3(1):a006833.
- 583 2. Imran M, Mahmood S. An overview of human prion diseases. *Virology.* 2011;8:559.
- 584 3. Surewicz WK, Apostol MI. Prion protein and its conformational conversion: a structural  
585 perspective. *Top Curr Chem.* 2011;305:135-67.
- 586 4. Zahn R, Liu A, Luhrs T, Riek R, von Schroetter C, Lopez Garcia F, et al. NMR solution structure  
587 of the human prion protein. *Proceedings of the National Academy of Sciences of the United States of*  
588 *America.* 2000 Jan 4;97(1):145-50.
- 589 5. Walter ED, Chattopadhyay M, Millhauser GL. The affinity of copper binding to the prion protein  
590 octarepeat domain: evidence for negative cooperativity. *Biochemistry.* 2006 Oct 31;45(43):13083-92.
- 591 6. Hasnain SS, Murphy LM, Strange RW, Grossmann JG, Clarke AR, Jackson GS, et al. XAFS  
592 study of the high-affinity copper-binding site of human PrP(91-231) and its low-resolution structure in  
593 solution. *Journal of molecular biology.* 2001 Aug 17;311(3):467-73.
- 594 7. Abskharon RN, Giachin G, Wohlkonig A, Soror SH, Pardon E, Legname G, et al. Probing the N-  
595 terminal beta-sheet conversion in the crystal structure of the human prion protein bound to a nanobody. *J*  
596 *Am Chem Soc.* 2014 Jan 22;136(3):937-44.
- 597 8. Jobling MF, Stewart LR, White AR, McLean C, Friedhuber A, Maher F, et al. The hydrophobic  
598 core sequence modulates the neurotoxic and secondary structure properties of the prion peptide 106-126.  
599 *J Neurochem.* 1999 Oct;73(4):1557-65.
- 600 9. Kuwata K, Matumoto T, Cheng H, Nagayama K, James TL, Roder H. NMR-detected hydrogen  
601 exchange and molecular dynamics simulations provide structural insight into fibril formation of prion  
602 protein fragment 106-126. *Proceedings of the National Academy of Sciences of the United States of*  
603 *America.* 2003 Dec 9;100(25):14790-5.
- 604 10. Oesch B, Westaway D, Wälchli M, McKinley MP, Kent SBH, Aebersold R, et al. A cellular gene  
605 encodes scrapie PrP 27-30 protein. *Cell.* 1985 1985/04/01;40(4):735-46.
- 606 11. Parchi P, Zou W, Wang W, Brown P, Capellari S, Ghetti B, et al. Genetic influence on the  
607 structural variations of the abnormal prion protein. *Proceedings of the National Academy of Sciences.*  
608 2000;97(18):10168-72.
- 609 12. Legname G, Baskakov IV, Nguyen HO, Riesner D, Cohen FE, DeArmond SJ, et al. Synthetic  
610 mammalian prions. *Science.* 2004 Jul 30;305(5684):673-6.
- 611 13. Gasperini L, Meneghetti E, Pastore B, Benetti F, Legname G. Prion protein and copper  
612 cooperatively protect neurons by modulating NMDA receptor through S-nitrosylation. *Antioxid Redox*  
613 *Signal.* 2015 Mar 20;22(9):772-84.
- 614 14. Khosravani H, Zhang Y, Tsutsui S, Hameed S, Altier C, Hamid J, et al. Prion protein attenuates  
615 excitotoxicity by inhibiting NMDA receptors. *The Journal of cell biology.* 2008 May 5;181(3):551-65.

- 616 15. Jones CE, Abdelraheim SR, Brown DR, Viles JH. Preferential Cu<sup>2+</sup> coordination by His96 and  
617 His111 induces beta-sheet formation in the unstructured amyloidogenic region of the prion protein. *The*  
618 *Journal of biological chemistry*. 2004 Jul 30;279(31):32018-27.
- 619 16. Thakur AK, Srivastava AK, Srinivas V, Chary KV, Rao CM. Copper alters aggregation behavior  
620 of prion protein and induces novel interactions between its N- and C-terminal regions. *The Journal of*  
621 *biological chemistry*. 2011 Nov 4;286(44):38533-45.
- 622 17. Wells MA, Jackson GS, Jones S, Hosszu LL, Craven CJ, Clarke AR, et al. A reassessment of  
623 copper(II) binding in the full-length prion protein. *Biochem J*. 2006 Nov 1;399(3):435-44.
- 624 18. Wong E, Thackray AM, Bujdoso R. Copper induces increased beta-sheet content in the scrapie-  
625 susceptible ovine prion protein PrP<sup>VQR</sup> compared with the resistant allelic variant PrP<sup>PARR</sup>. *Biochem J*.  
626 2004 May 15;380(Pt 1):273-82.
- 627 19. Migliorini C, Sinicropi A, Kozłowski H, Luczkowski M, Valensin D. Copper-induced structural  
628 propensities of the amyloidogenic region of human prion protein. *J Biol Inorg Chem*. 2014 Jun;19(4-  
629 5):635-45.
- 630 20. D'Angelo P, Della Longa S, Arcovito A, Mancini G, Zitolo A, Chillemi G, et al. Effects of the  
631 pathological Q212P mutation on human prion protein non-octarepeat copper-binding site. *Biochemistry*.  
632 2012 Aug 7;51(31):6068-79.
- 633 21. Giachin G, Mai PT, Tran TH, Salzano G, Benetti F, Migliorati V, et al. The non-octarepeat  
634 copper binding site of the prion protein is a key regulator of prion conversion. *Sci Rep*. 2015;5:15253.
- 635 22. Goldmann W, Hunter N, Smith G, Foster J, Hope J. PrP genotype and agent effects in scrapie:  
636 change in allelic interaction with different isolates of agent in sheep, a natural host of scrapie. *J Gen*  
637 *Viro*. 1994 May;75 ( Pt 5):989-95.
- 638 23. Nonno R, Bari MAD, Cardone F, Vaccari G, Fazzi P, Dell'Omo G, et al. Efficient Transmission  
639 and Characterization of Creutzfeldt–Jakob Disease Strains in Bank Voles. *PLOS Pathogens*.  
640 [doi:10.1371/journal.ppat.0020012]. 2006;2(2):e12.
- 641 24. Mertens HDT, Svergun DI. Structural characterization of proteins and complexes using small-  
642 angle X-ray solution scattering. *J Struct Biol*. 2010 Oct;172(1):128-41.
- 643 25. Bernado P, Svergun DI. Structural analysis of intrinsically disordered proteins by small-angle X-  
644 ray scattering. *Mol Biosyst*. 2012;8(1):151-67.
- 645 26. Holm RH, Kennepohl P, Solomon EI. Structural and Functional Aspects of Metal Sites in  
646 Biology. *Chemical Reviews*. [doi: 10.1021/cr9500390]. 1996 1996/01/01;96(7):2239-314.
- 647 27. Pernot P, Round A, Barrett R, De Maria Antolinos A, Gobbo A, Gordon E, et al. Upgraded ESRF  
648 BM29 beamline for SAXS on macromolecules in solution. *J Synchrotron Radiat*. 2013 Jul;20(Pt 4):660-4.
- 649 28. Brennich ME, Round AR, Hutin S. Online Size-exclusion and Ion-exchange Chromatography on  
650 a SAXS Beamline. *J Vis Exp*. 2017 Jan 5(119).

- 651 29. Orthaber D, Bergmann A, Glatter O. SAXS experiments on absolute scale with Kratky systems  
652 using water as a secondary standard. *Journal of Applied Crystallography*. 2000;33(2):218-25.
- 653 30. Brennich ME, Kieffer J, Bonamis G, De Maria Antolinos A, Hutin S, Pernot P, et al. Online data  
654 analysis at the ESRF bioSAXS beamline, BM29. *Journal of Applied Crystallography*. 2016;49(1):203-12.
- 655 31. Petoukhov MV, Franke D, Shkumatov AV, Tria G, Kikhney AG, Gajda M, et al. New  
656 developments in the ATSAS program package for small-angle scattering data analysis. *J Appl*  
657 *Crystallogr*. 2012 Apr 1;45(Pt 2):342-50.
- 658 32. Trewthella J, Duff AP, Durand D, Gabel F, Guss JM, Hendrickson WA, et al. 2017 publication  
659 guidelines for structural modelling of small-angle scattering data from biomolecules in solution: an  
660 update. *Acta Crystallogr D Struct Biol*. 2017 Sep 1;73(Pt 9):710-28.
- 661 33. Franke D, Petoukhov MV, Konarev PV, Panjkovich A, Tuukkanen A, Mertens HDT, et al.  
662 ATSAS 2.8: a comprehensive data analysis suite for small-angle scattering from macromolecular  
663 solutions. *J Appl Crystallogr*. 2017 Aug 1;50(Pt 4):1212-25.
- 664 34. Svergun DI. Determination of the Regularization Parameter in Indirect-Transform Methods Using  
665 Perceptual Criteria. *Journal of Applied Crystallography*. 1992 Aug 1;25:495-503.
- 666 35. Christen B, Perez DR, Hornemann S, Wuthrich K. NMR Structure of the Bank Vole Prion  
667 Protein at 20 degrees C Contains a Structured Loop of Residues 165-171. *Journal of molecular biology*.  
668 2008 Nov 7;383(2):306-12.
- 669 36. Lysek DA, Schorn C, Nivon LG, Esteve-Moya V, Christen B, Calzolari L, et al. Prion protein  
670 NMR structures of cats, dogs, pigs, and sheep. *Proceedings of the National Academy of Sciences of the*  
671 *United States of America*. 2005 Jan 18;102(3):640-5.
- 672 37. Bernado P, Mylonas E, Petoukhov MV, Blackledge M, Svergun DI. Structural characterization of  
673 flexible proteins using small-angle X-ray scattering. *J Am Chem Soc*. 2007 May 2;129(17):5656-64.
- 674 38. Tria G, Mertens HDT, Kachala M, Svergun DI. Advanced ensemble modelling of flexible  
675 macromolecules using X-ray solution scattering. *Iucrj*. 2015 Mar;2:207-17.
- 676 39. Proux O, Biquard X, Lahera E, Menthonnex JJ, Prat A, Ulrich O, et al. FAME: a new beamline  
677 for x-ray absorption investigations of very-diluted systems of environmental, material and biological  
678 interests. *Physica Scripta*. 2005;2005(T115):970.
- 679 40. Filipponi A, Di Cicco A. X-ray-absorption spectroscopy and n-body distribution functions in  
680 condensed matter. II. Data analysis and applications. *Physical review B, Condensed matter*. 1995 Dec  
681 1;52(21):15135-49.
- 682 41. Filipponi A, Di Cicco A, Natoli CR. X-ray-absorption spectroscopy and n-body distribution  
683 functions in condensed matter. I. Theory. *Physical review B, Condensed matter*. 1995 Dec  
684 1;52(21):15122-34.
- 685 42. D'Angelo P, Bottari E, Festa MR, Nolting HF, Pavel NV. X-ray Absorption Study of Copper(II)-  
686 Glycinate Complexes in Aqueous Solution. *J Phys Chem B*. 1998;102:3114-22.

- 687 43. Franke D, Jeffries CM, Svergun DI. Correlation Map, a goodness-of-fit test for one-dimensional  
688 X-ray scattering spectra. *Nat Methods*. 2015 May;12(5):419-22.
- 689 44. Carter L, Kim SJ, Schneidman-Duhovny D, Stohr J, Poncet-Montange G, Weiss TM, et al. Prion  
690 Protein-Antibody Complexes Characterized by Chromatography-Coupled Small-Angle X-Ray Scattering.  
691 *Biophys J*. 2015 Aug 18;109(4):793-805.
- 692 45. Giachin G, Biljan I, Ilc G, Plavec J, Legname G. Probing early misfolding events in prion protein  
693 mutants by NMR spectroscopy. *Molecules*. 2013 Aug 07;18(8):9451-76.
- 694 46. Bocharova OV, Breydo L, Salnikov VV, Baskakov IV. Copper(II) inhibits in vitro conversion of  
695 prion protein into amyloid fibrils. *Biochemistry*. 2005 May 10;44(18):6776-87.
- 696 47. Orem NR, Geoghegan JC, Deleault NR, Kascsak R, Supattapone S. Copper (II) ions potently  
697 inhibit purified PrPres amplification. *J Neurochem*. 2006 Mar;96(5):1409-15.
- 698 48. McMahon HE, Mange A, Nishida N, Creminon C, Casanova D, Lehmann S. Cleavage of the  
699 amino terminus of the prion protein by reactive oxygen species. *J Biol Chem*. 2001 Jan 19;276(3):2286-  
700 91.
- 701 49. Yamamoto N, Kuwata K. Difference in redox behaviors between copper-binding octarepeat and  
702 nonoctarepeat sites in prion protein. *J Biol Inorg Chem*. 2009 Nov;14(8):1209-18.
- 703 50. Vazquez-Fernandez E, Vos MR, Afanasyev P, Cebey L, Sevillano AM, Vidal E, et al. The  
704 Structural Architecture of an Infectious Mammalian Prion Using Electron Cryomicroscopy. *PLoS Pathog*.  
705 2016 Sep;12(9):e1005835.
- 706 51. Eigenbrod S, Frick P, Bertsch U, Mitteregger-Kretzschmar G, Mielke J, Maringer M, et al.  
707 Substitutions of PrP N-terminal histidine residues modulate scrapie disease pathogenesis and incubation  
708 time in transgenic mice. *PLoS One*. 2017;12(12):e0188989.
- 709 52. Ashok A, Hegde RS. Selective Processing and Metabolism of Disease-Causing Mutant Prion  
710 Proteins. *PLOS Pathogens*. [doi:10.1371/journal.ppat.1000479]. 2009;5(6):e1000479.
- 711 53. Christen B, Perez DR, Hornemann S, Wuthrich K. NMR structure of the bank vole prion protein  
712 at 20 degrees C contains a structured loop of residues 165-171. *J Mol Biol*. 2008 Nov 7;383(2):306-12.
- 713 54. Cartoni C, Schinina ME, Maras B, Nonno R, Vaccari G, Di Baria MA, et al. Identification of the  
714 pathological prion protein allotypes in scrapie-infected heterozygous bank voles (*Clethrionomys*  
715 *glareolus*) by high-performance liquid chromatography-mass spectrometry. *J Chromatogr A*. 2005 Jul  
716 15;1081(1):122-6.
- 717 55. Sigurdson CJ, Nilsson KP, Hornemann S, Manco G, Fernandez-Borges N, Schwarz P, et al. A  
718 molecular switch controls interspecies prion disease transmission in mice. *J Clin Invest*. 2010  
719 Jul;120(7):2590-9.
- 720 56. Rossetti G, Giachin G, Legname G, Carloni P. Structural facets of disease-linked human prion  
721 protein mutants: a molecular dynamic study. *Proteins*. 2010 Dec;78(16):3270-80.

- 722 57. Eghiaian F, Grosclaude J, Lesceu S, Debey P, Doublet B, Treguer E, et al. Insight into the PrPC--  
723 >PrPSc conversion from the structures of antibody-bound ovine prion scrapie-susceptibility variants.  
724 Proceedings of the National Academy of Sciences of the United States of America. 2004 Jul  
725 13;101(28):10254-9.
- 726 58. Lysek DA, Schorn C, Nivon LG, Esteve-Moya V, Christen B, Calzolari L, et al. Prion protein  
727 NMR structures of cats, dogs, pigs, and sheep. Proceedings of the National Academy of Sciences of the  
728 United States of America. 2005 Jan 18;102(3):640-5.
- 729 59. Spevacek AR, Evans EG, Miller JL, Meyer HC, Pelton JG, Millhauser GL. Zinc drives a tertiary  
730 fold in the prion protein with familial disease mutation sites at the interface. Structure (London, England :  
731 1993). 2013 Feb 5;21(2):236-46.
- 732 60. Evans EG, Pushie MJ, Markham KA, Lee HW, Millhauser GL. Interaction between Prion  
733 Protein's Copper-Bound Octarepeat Domain and a Charged C-Terminal Pocket Suggests a Mechanism for  
734 N-Terminal Regulation. Structure (London, England : 1993). 2016 Jul 6;24(7):1057-67.
- 735 61. Sonati T, Reimann RR, Falsig J, Baral PK, O'Connor T, Hornemann S, et al. The toxicity of  
736 antiprion antibodies is mediated by the flexible tail of the prion protein. Nature. 2013 Sep  
737 5;501(7465):102-6.
- 738
- 739





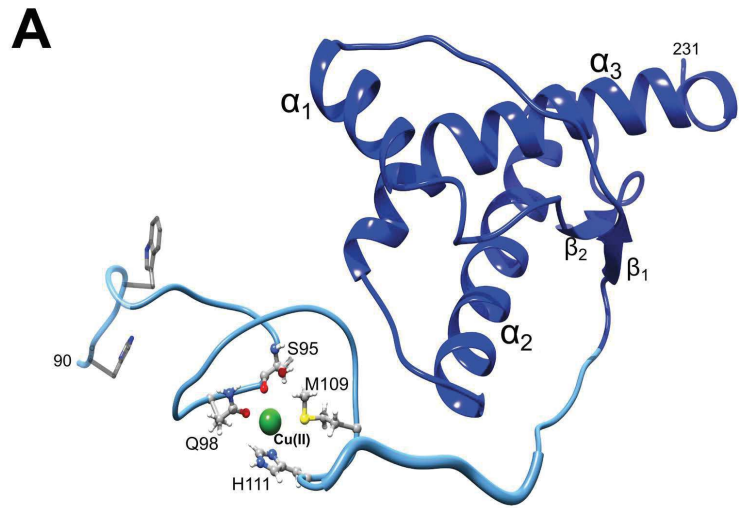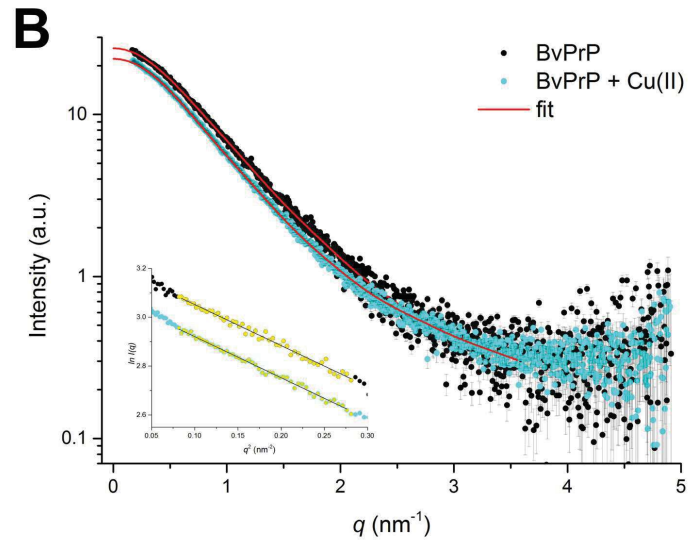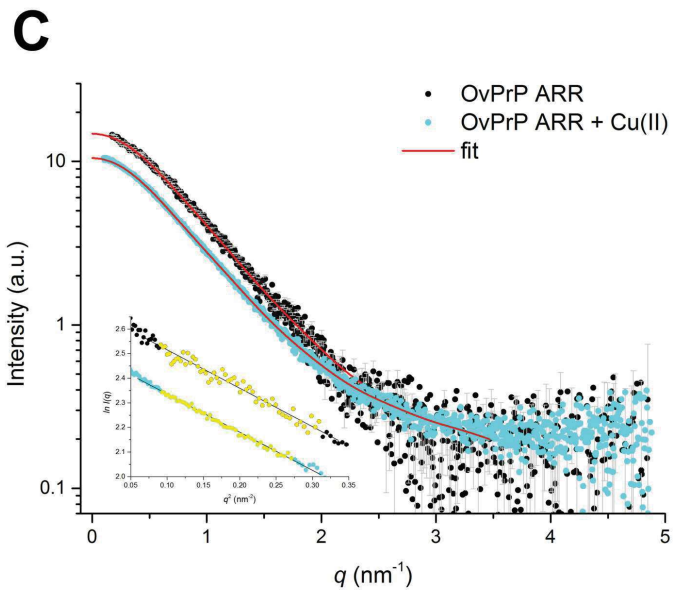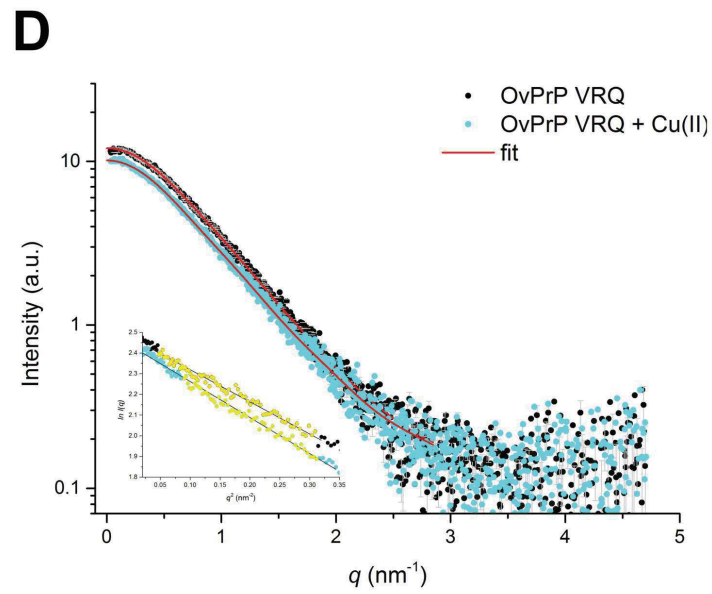

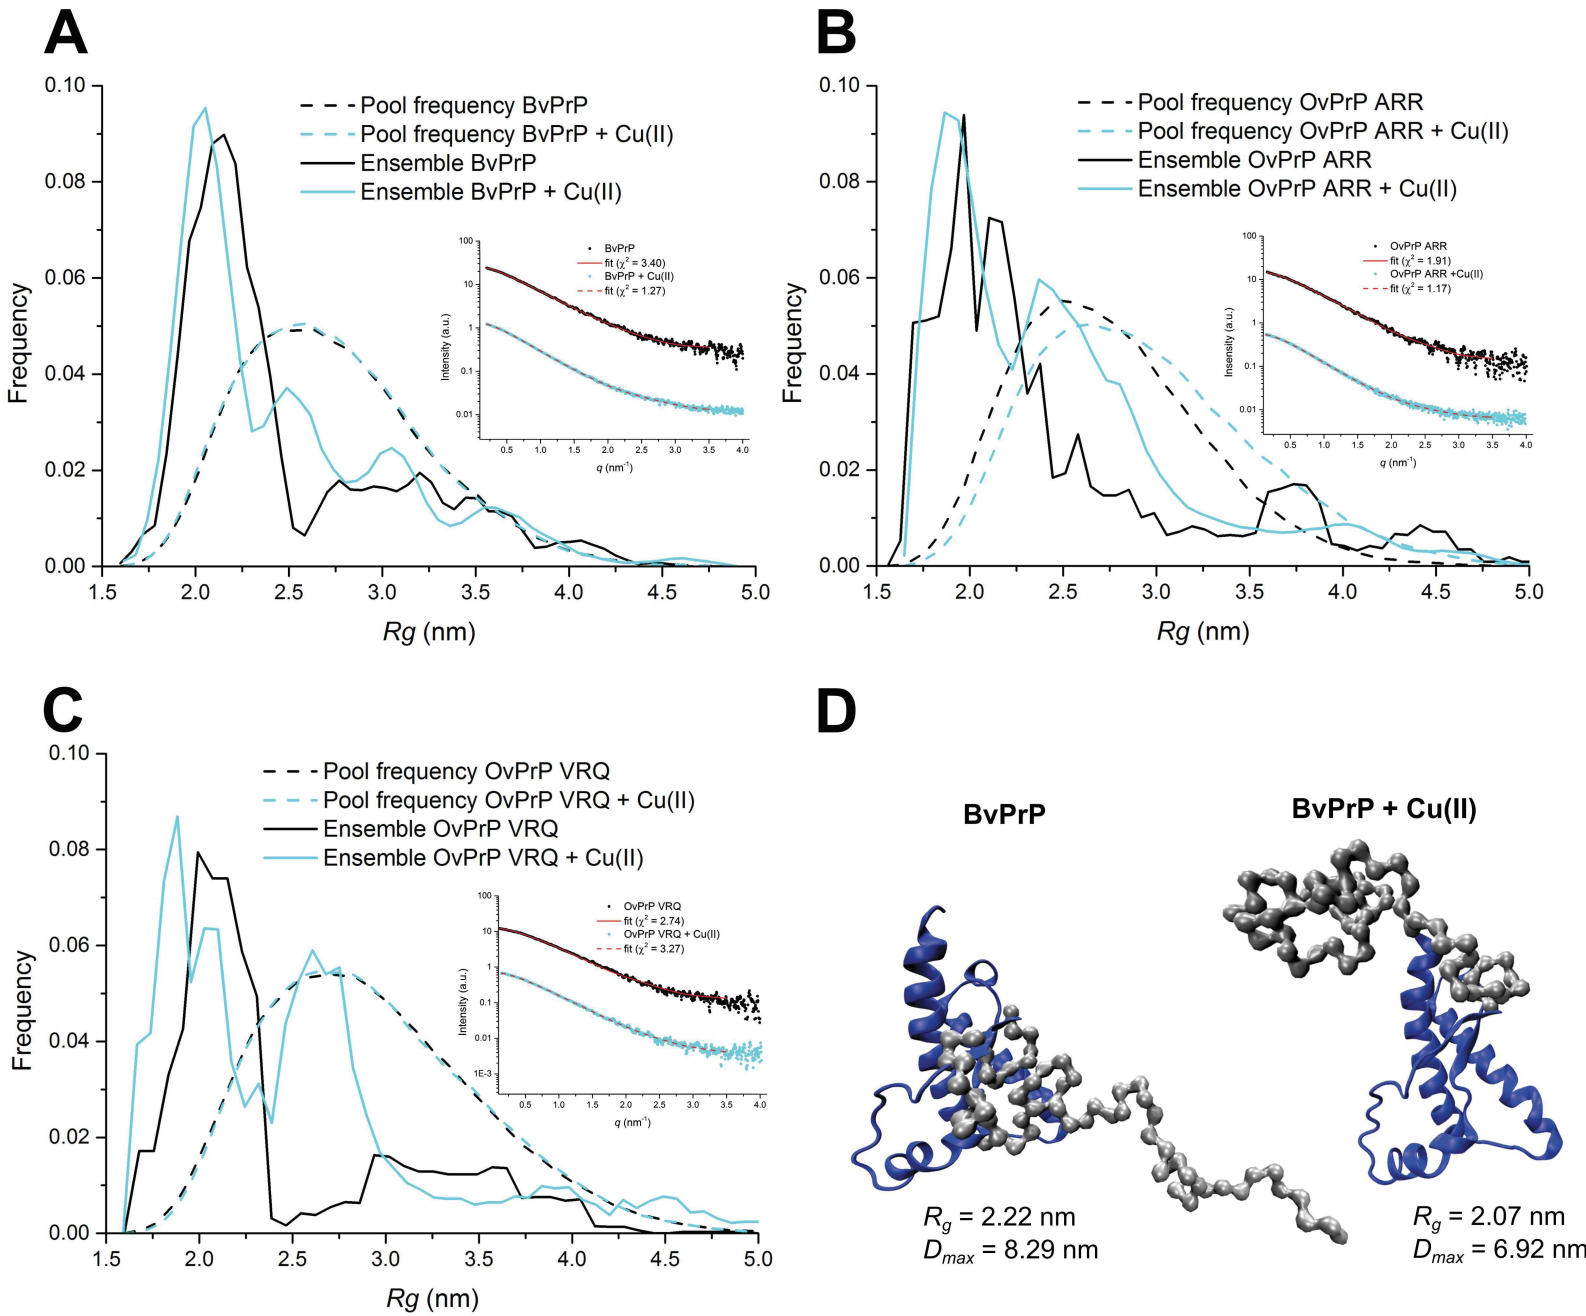

**A**

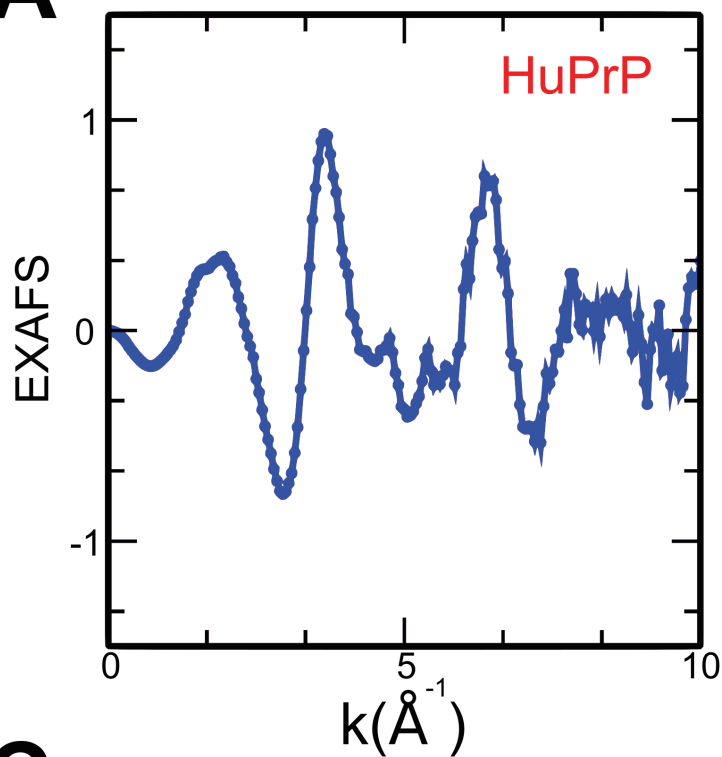

**B**

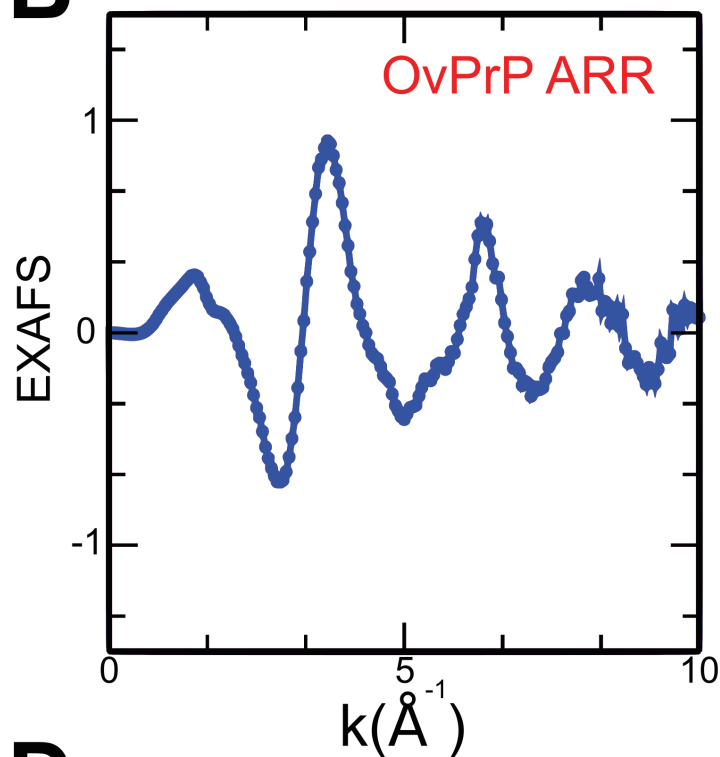

**C**

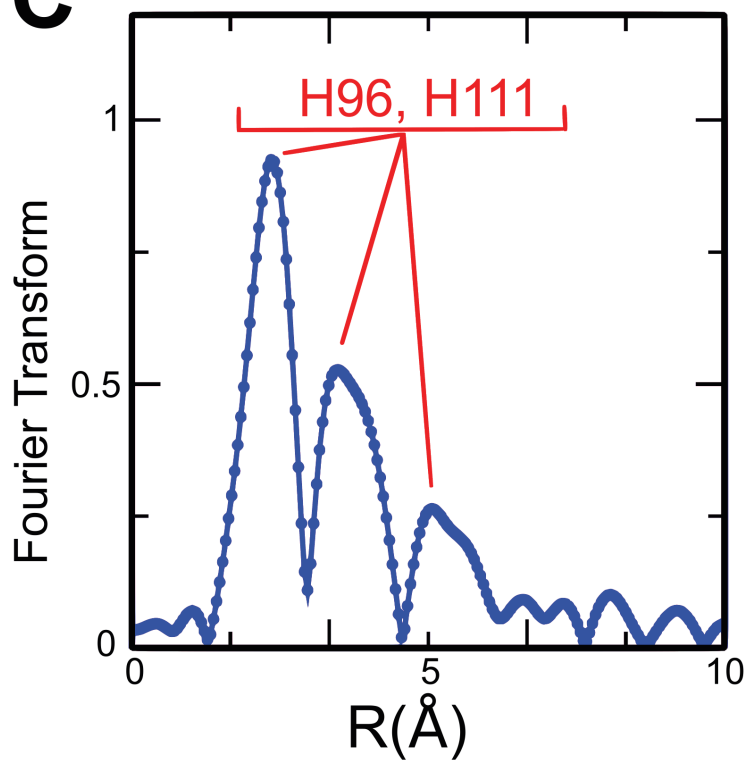

**D**

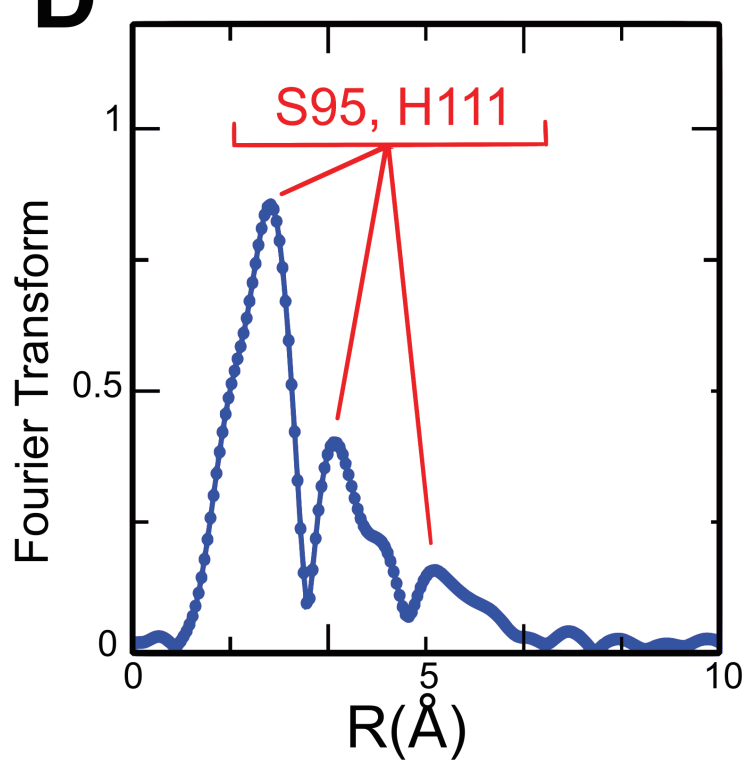

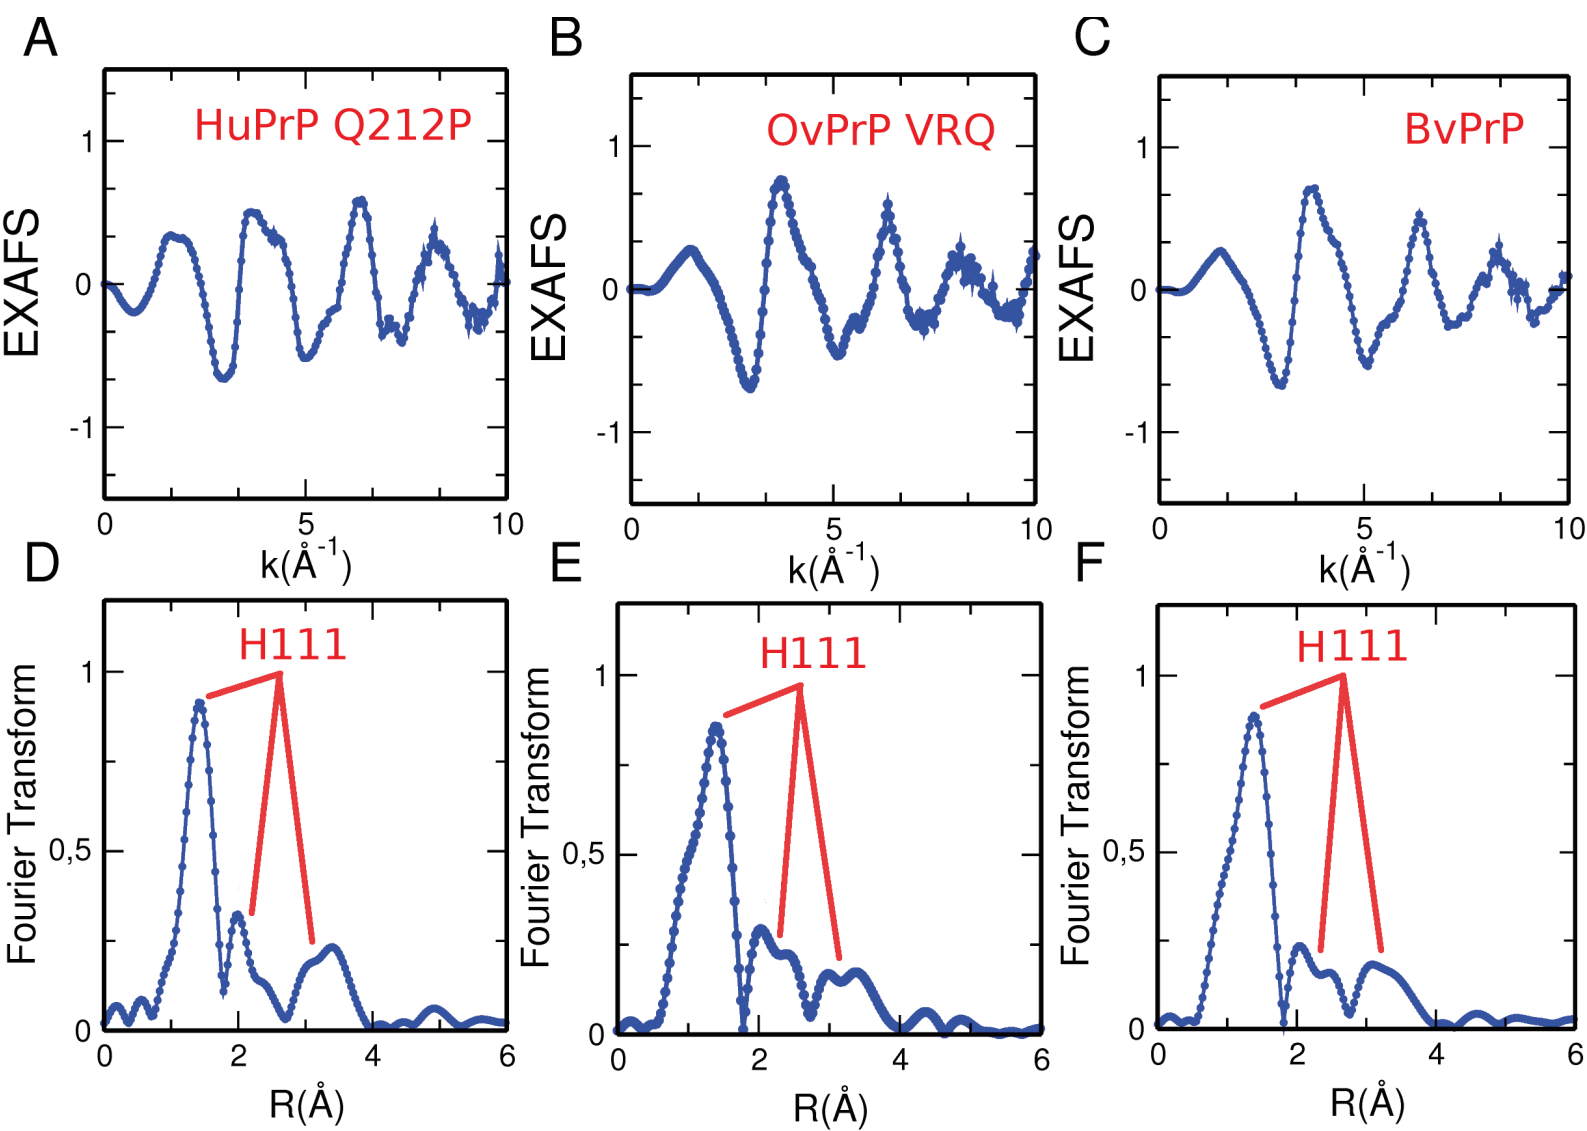

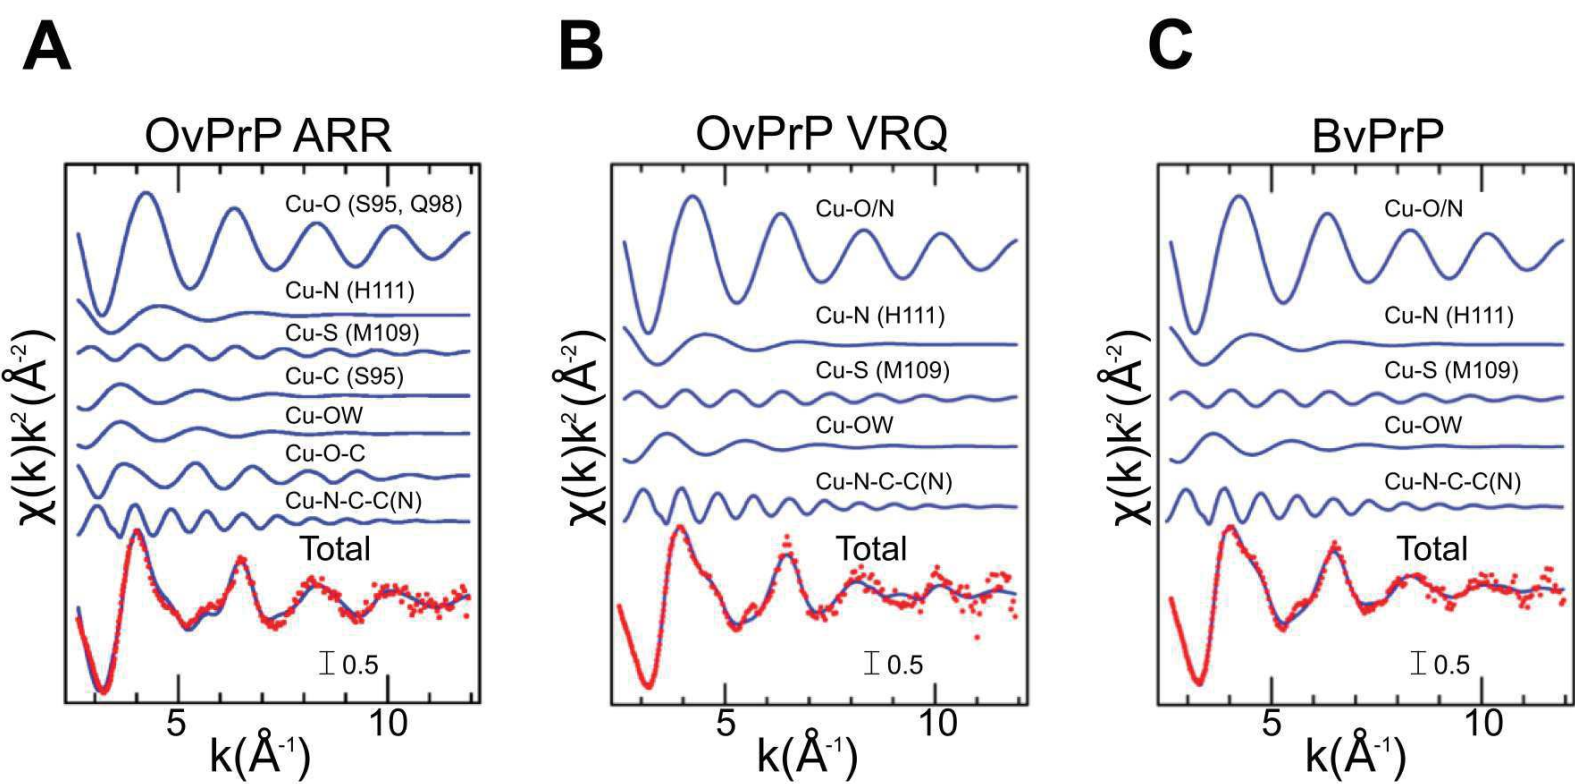

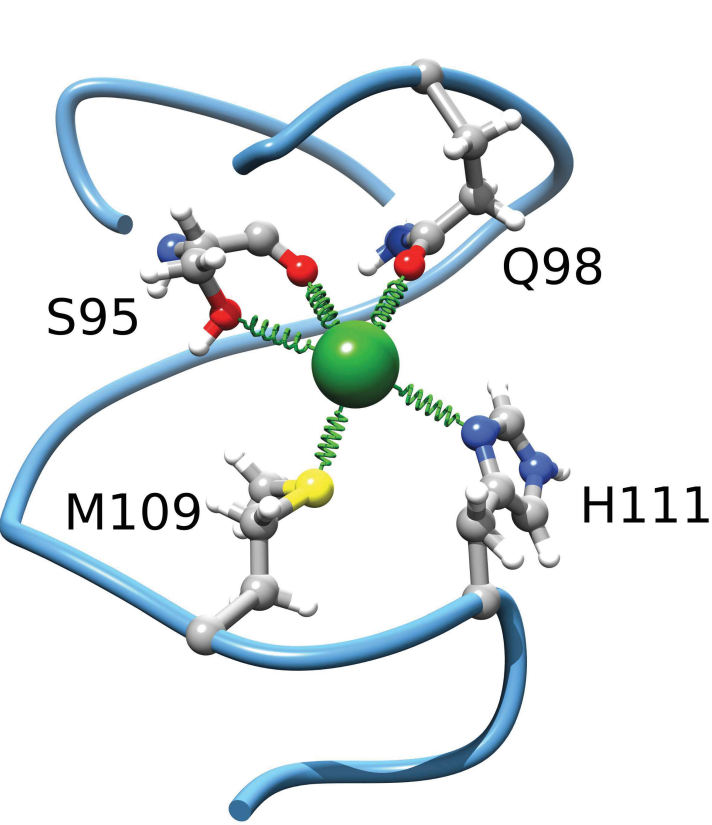

type-1  
OvPrP ARR

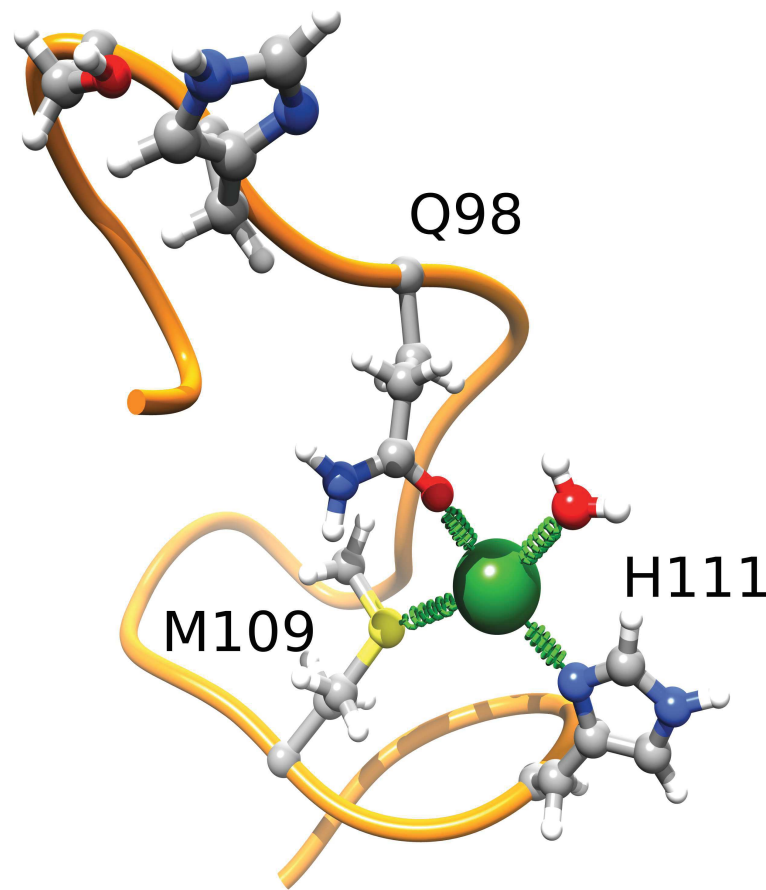

type-2  
OvPrP VRQ  
BvPrP

 low prion susceptibility  
 high prion susceptibility
